# Supplementary material for: Benchmarking long-read genome sequence alignment tools for human genomics applications
Source: PeerJ journal article supplement (doi:10.7717/peerj.16515), 2023-12-18

# S5: Nanopore SVs 10,001 – 100,000 bp

## Deletions

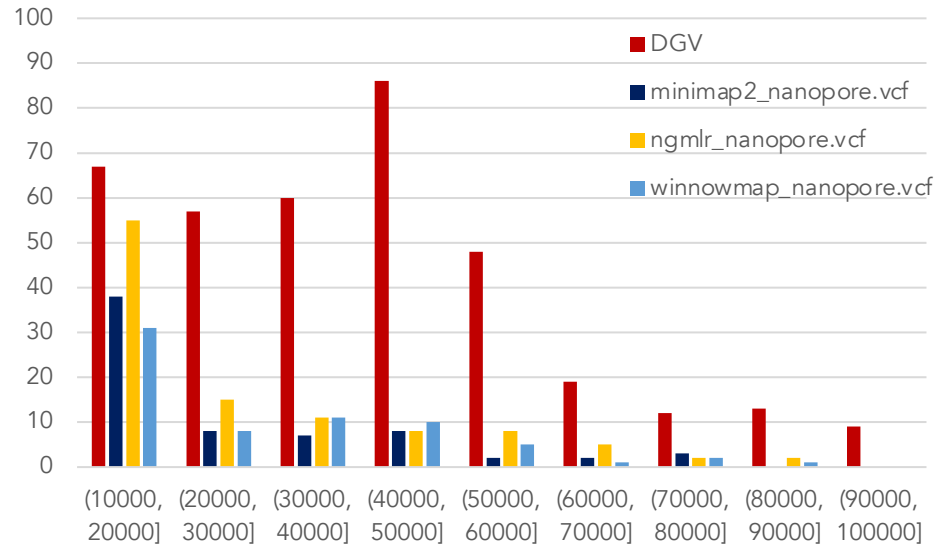

## Insertions

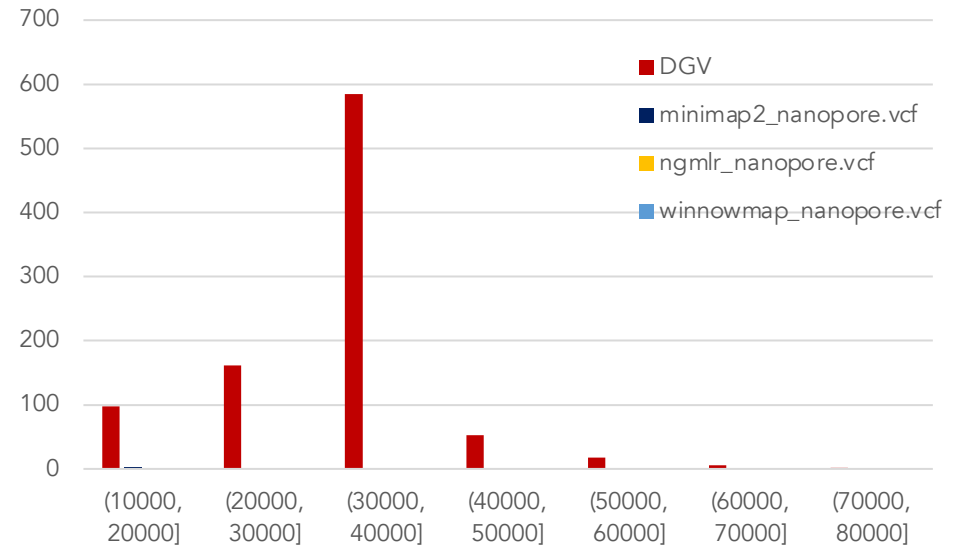

## Inversions

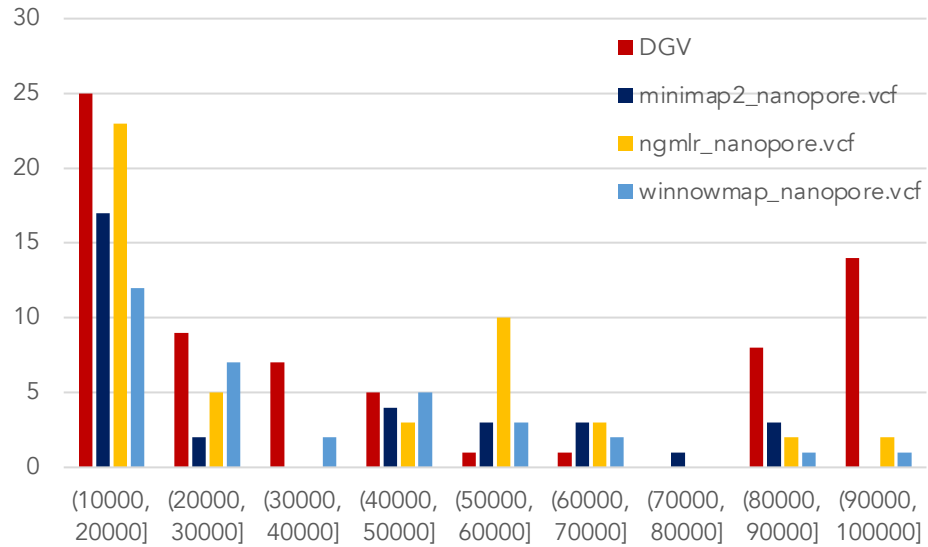

## Duplications

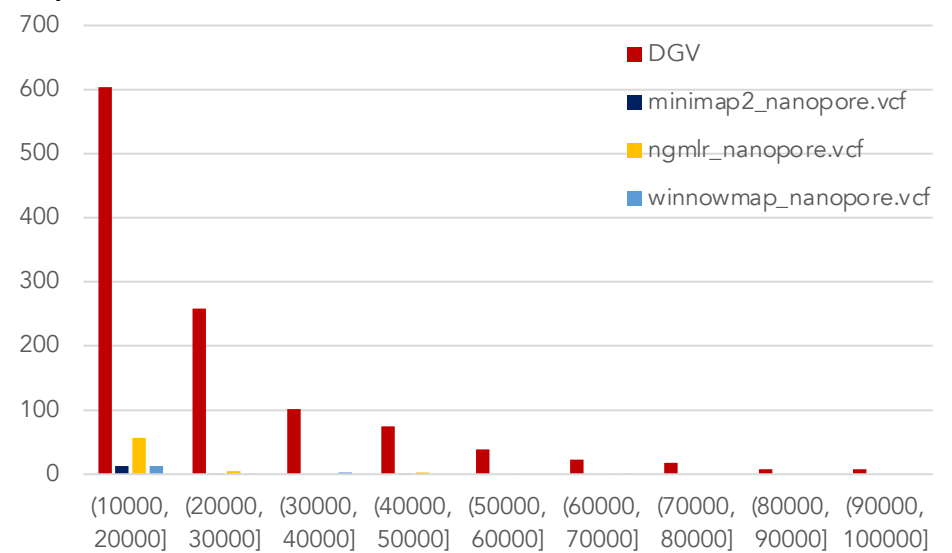

## S6: SMRT-CCS SVs 10,001 – 100,000 bp

### Deletions

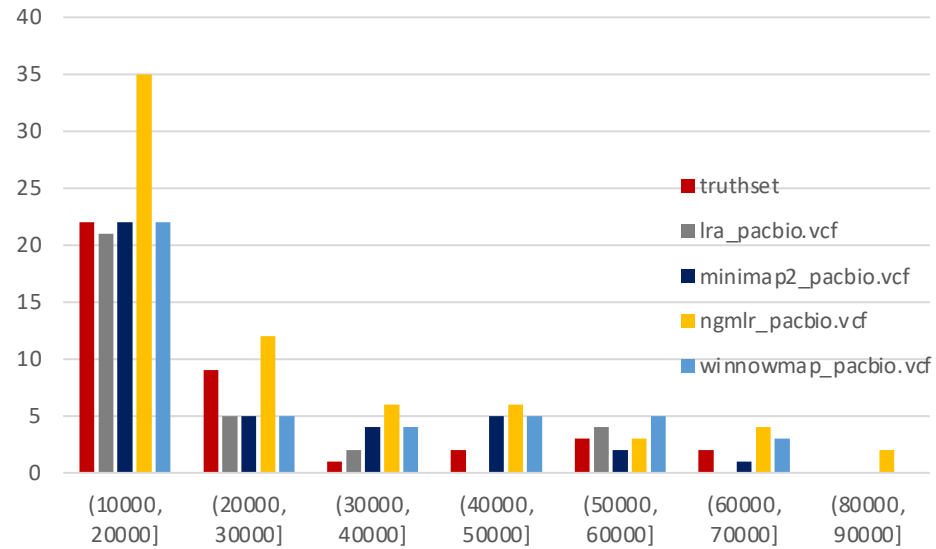

### Insertions

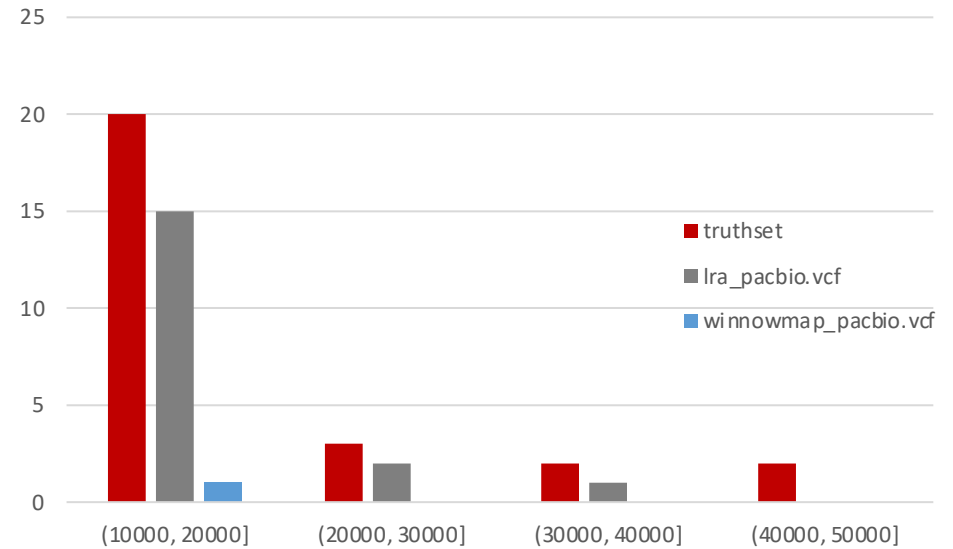

### Duplications

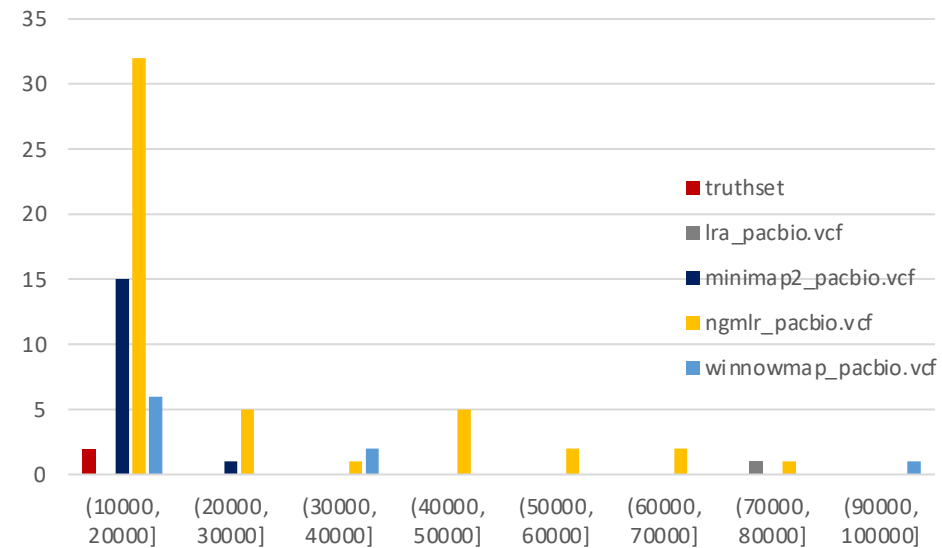

Supplement: S5S6.pdf [file S5S6.pdf]
